# Supplementary material
Source: MDPI journal article supplement (https://www.mdpi.com/2673-5636/3/4/46)
Supplement: s1 [file s1]

*Supplementary Table S1: Poisson regression on the total counts of birds seen in each enclosure zone for each time code for each month of the study.*

Season (as a predictor) was also first included but this showed high collinearity with month and was removed. The interaction between time code and enclosure zone was also included in the model. The zone “Water”, the time code “Afternoon” and the month “May” were used as the reference levels for the model.

| Behaviour      | Predictor     | Coefficient | SE     | Z value | P value |
|----------------|---------------|-------------|--------|---------|---------|
| Moving         | Zone          |             |        |         |         |
| $r^2 = 77.8\%$ | Back grass    | -2.513      | 0.158  | -15.93  | <0.001  |
| AIC = 1016.9   | Big Island    | 0.004       | 0.057  | 0.070   | 0.944   |
|                | Front grass   | -4.073      | 0.38   | -10.71  | <0.001  |
|                | Little island | -1.565      | 0.102  | -15.33  | <0.001  |
|                | Right grass   | -2.885      | 0.253  | -11.38  | <0.001  |
|                | Rushes        | -1.355      | 0.089  | -15.09  | <0.001  |
|                | Month         |             |        |         |         |
|                | April         | -0.7529     | 0.0696 | -10.82  | <0.001  |
|                | July          | -0.803      | 0.0714 | -11.24  | <0.001  |
|                | June          | -0.5995     | 0.067  | -8.95   | <0.001  |
|                | March         | -3.206      | 0.271  | -11.83  | <0.001  |
|                | Time          |             |        |         |         |
|                | Dawn          | -4.96       | 1.00   | -4.95   | <0.001  |
|                | Dusk          | -0.8849     | 0.0658 | -13.45  | <0.001  |
|                | Early         | -3.247      | 0.281  | -11.57  | <0.001  |
|                | Morning       | -0.8728     | 0.0646 | -13.51  | <0.001  |
|                | Night         | -1.989      | 0.112  | -17.77  | <0.001  |
| Forage         | Zone          |             |        |         |         |
| $r^2 = 83.7\%$ | Back land     | -2.881      | 0.138  | -20.88  | <0.001  |
| AIC = 1085.2   | Big Island    | -0.8533     | 0.0533 | -16.01  | <0.001  |
|                | Front land    | -4.36       | 0.303  | -14.39  | <0.001  |
|                | Little island | -2.1192     | 0.095  | -22.32  | <0.001  |
|                | Right bank    | -3.224      | 0.211  | -15.3   | <0.001  |
|                | Rushes        | -1.4912     | 0.069  | -21.61  | <0.001  |
|                | Month         |             |        |         |         |
|                | April         | -0.2101     | 0.0513 | -4.1    | <0.001  |
|                | July          | -0.8681     | 0.0632 | -13.72  | <0.001  |
|                | June          | -1.2189     | 0.0721 | -16.92  | <0.001  |
|                | March         | -2.825      | 0.217  | -13.01  | <0.001  |
|                | Time          |             |        |         |         |
|                | Dawn          | -3.868      | 0.502  | -7.71   | <0.001  |
|                | Dusk          | -0.358      | 0.0497 | -7.2    | <0.001  |
|                | Early         | -2.626      | 0.19   | -13.84  | <0.001  |
|                | Morning       | -1.1387     | 0.0641 | -17.76  | <0.001  |
|                | Night         | -1.9607     | 0.0964 | -20.34  | <0.001  |
| Resting        | Zone          |             |        |         |         |
| $r^2 = 86.2\%$ | Back land     | -3.482      | 0.253  | -13.75  | <0.001  |

|                        |               |         |        |        |        |
|------------------------|---------------|---------|--------|--------|--------|
| AIC= 1504.1            | Big Island    | 1.1569  | 0.0459 | 25.19  | <0.001 |
|                        | Front land    | -20     | 580    | -0.03  | 0.973  |
|                        | Little island | -1.981  | 0.118  | -16.76 | <0.001 |
|                        | Right bank    | -20     | 716    | -0.03  | 0.978  |
|                        | Rushes        | -2.223  | 0.124  | -17.94 | <0.001 |
|                        | <i>Month</i>  |         |        |        |        |
|                        | April         | -0.4081 | 0.0485 | -8.42  | <0.001 |
|                        | July          | -0.8905 | 0.056  | -15.89 | <0.001 |
|                        | June          | -0.6985 | 0.0529 | -13.21 | <0.001 |
|                        | March         | -3.71   | 0.226  | -16.42 | <0.001 |
|                        | <i>Time</i>   |         |        |        |        |
|                        | Dawn          | -0.371  | 0.119  | -3.13  | 0.002  |
|                        | Dusk          | -1.7513 | 0.0689 | -25.43 | <0.001 |
|                        | Early         | -3.603  | 0.291  | -12.39 | <0.001 |
|                        | Morning       | -0.3924 | 0.0414 | -9.49  | <0.001 |
|                        | Night         | -3.099  | 0.139  | -22.33 | <0.001 |
| Preening               | <i>Zone</i>   |         |        |        |        |
| r <sup>2</sup> = 84.4% | Back land     | -4.659  | 0.502  | -9.28  | <0.001 |
| AIC= 928.5             | Big Island    | 0.5843  | 0.0558 | 10.48  | <0.001 |
|                        | Front land    | -5.227  | 0.709  | -7.38  | <0.001 |
|                        | Little island | -1.462  | 0.106  | -13.82 | <0.001 |
|                        | Right bank    | -3.8    | 0.411  | -9.25  | <0.001 |
|                        | Rushes        | -1.828  | 0.12   | -15.2  | <0.001 |
|                        | <i>Month</i>  |         |        |        |        |
|                        | April         | -0.2642 | 0.0615 | -4.3   | <0.001 |
|                        | July          | -0.9597 | 0.077  | -12.46 | <0.001 |
|                        | June          | -0.7921 | 0.0725 | -10.92 | <0.001 |
|                        | March         | -3.179  | 0.246  | -12.9  | <0.001 |
|                        | <i>Time</i>   |         |        |        |        |
|                        | Dawn          | -2.129  | 0.307  | -6.94  | <0.001 |
|                        | Dusk          | -1.3501 | 0.0784 | -17.23 | <0.001 |
|                        | Early         | -3.063  | 0.292  | -10.48 | <0.001 |
|                        | Morning       | -0.4008 | 0.0553 | -7.24  | <0.001 |
|                        | Night         | -3.466  | 0.221  | -15.67 | <0.001 |
| Courtship              | <i>Zone</i>   |         |        |        |        |
| r <sup>2</sup> = 81.8% | Back land     | -1.781  | 0.149  | -11.99 | <0.001 |
| AIC= 888.9             | Big Island    | 0.7425  | 0.0643 | 11.55  | <0.001 |
|                        | Front land    | -3.089  | 0.307  | -10.07 | <0.001 |
|                        | Little island | -1.054  | 0.106  | -9.94  | <0.001 |
|                        | Right bank    | -5.24   | 1      | -5.23  | <0.001 |
|                        | Rushes        | -1.364  | 0.119  | -11.45 | <0.001 |
|                        | <i>Month</i>  |         |        |        |        |
|                        | April         | 0.0102  | 0.0692 | 0.15   | 0.883  |
|                        | July          | -0.6388 | 0.0843 | -7.58  | <0.001 |
|                        | June          | -0.3481 | 0.0768 | -4.53  | <0.001 |
|                        | March         | -1.813  | 0.152  | -11.95 | <0.001 |

|  |             |         |        |        |        |
|--|-------------|---------|--------|--------|--------|
|  | <i>Time</i> |         |        |        |        |
|  | Dawn        | -19     | 636    | -0.03  | 0.977  |
|  | Dusk        | -1.8318 | 0.0949 | -19.3  | <0.001 |
|  | Early       | -4.446  | 0.579  | -7.67  | <0.001 |
|  | Morning     | -0.8188 | 0.0619 | -13.23 | <0.001 |
|  | Night       | -5.097  | 0.501  | -10.17 | <0.001 |
